# Supplementary material for: Exploring the Impact of PARK2 Mutations on the Total and Mitochondrial Proteome of Human Skin Fibroblasts
Source: Front Cell Dev Biol. 2020 Jun 11;8:423. doi: 10.3389/fcell.2020.00423 (PMC7300190; doi:10.3389/fcell.2020.00423)
Supplement: Supplementary file 1 [file Table_1.xlsx]

## Sheet: Supplementary table 1
Supplementary table 1. List of 649 proteins identified in the mitochondrial fractions by shotgun proteomics showing a finite ratio
ID	Description	log 2 Ratio (P/C)	log 2 Variance (P/C)
Q6YN16	HSDL2 Hydroxysteroid dehydrogenase-like protein 2 Iso 1	-4.9608	0.5616
P61018	RAB4B Ras-related protein Rab-4B Iso 1	-4.5936	0.7056
O15327	INPP4B Type II inositol 3_4-bisphosphate 4-phosphatase Iso 1	-3.5712	2.0016
Q8N139	ABCA6 ATP-binding cassette sub-family A member 6 Iso 1	-3.5208	0.684
Q86UP8	GTF2IRD2 General transcription factor II-I repeat domain-containing protein 2A Iso 4	-3.0528	0.9072
Q8WWZ4	ABCA10 ATP-binding cassette sub-family A member 10 Iso 1	-3.2112	1.0944
Q6XYB7	LBX2 Transcription factor LBX2 Iso 1	-3.168	0.3096
P06733	ENO1 Alpha-enolase alpha-enolase	-2.8224	0.1656
Q6EKJ0	GTF2IRD2B General transcription factor II-I repeat domain-containing protein 2B Iso 1	-3.024	0.8496
P80723	BASP1 Brain acid soluble protein 1 Iso 1	-2.6352	0.4752
Q9BZJ0	CRNKL1 Crooked neck-like protein 1 Iso 3	-2.5488	0.8496
Q99536	VAT1 Synaptic vesicle membrane protein VAT-1 homolog Iso 1	-2.3184	0.5184
Q96KK5	HIST1H2AH Histone H2A type 1-H Iso 1	-2.2896	0.2304
P04908	HIST1H2AB;HIST1H2AE Histone H2A type 1-B/E Iso 1	-2.2896	0.2016
Q9UN86	G3BP2 Ras GTPase-activating protein-binding protein 2 B	-1.5048	1.0584
Q9BTM1	H2AFJ Histone H2A.J Iso 1	-2.2896	0.216
Q99878	HIST1H2AJ Histone H2A type 1-J Iso 1	-2.2896	0.216
Q16777	HIST2H2AC Histone H2A type 2-C Iso 1	-2.2896	0.1872
Q6FI13	HIST2H2AA3;HIST2H2AA4 Histone H2A type 2-A Iso 1	-2.2752	0.216
Q96QB1	DLC1 Rho GTPase-activating protein 7 Iso 2	-2.2464	0.3024
Q15084	PDIA6 Protein disulfide-isomerase A6 Iso 4	-0.3888	0.1152
Q96JJ7	TMX3 Protein disulfide-isomerase TMX3 Iso 2	-1.872	0.7344
P34931	HSPA1L Heat shock 70 kDa protein 1-like Iso 1	-2.2032	0.3168
P17066	HSPA6 Heat shock 70 kDa protein 6 Iso 1	-2.088	0.144
O43504	LAMTOR5 Ragulator complex protein LAMTOR5 Iso 1	-2.0592	0.2736
Q99757	TXN2 Thioredoxin_ mitochondrial Iso 1	-2.0304	0.5328
O43852	CALU Calumenin Iso 15	-0.8784	0.072
P54652	HSPA2 Heat shock-related 70 kDa protein 2 Iso 1	-2.016	0.144
Q14765	STAT4 Signal transducer and activator of transcription 4 Iso 1	-2.0016	0.2592
Q13422	IKZF1 DNA-binding protein Ikaros Ik7	-2.0016	0.4464
P11279	LAMP1 Lysosome-associated membrane glycoprotein 1 Iso 1	-1.9872	0.1872
P13929	ENO3 Beta-enolase Iso 2	-1.944	1.2672
Q9H2F5	EPC1 Enhancer of polycomb homolog 1 Iso 3	-1.7424	0.4752
P11142	HSPA8 Heat shock cognate 71 kDa protein Iso 1	-1.8576	0.144
Q01628	IFITM3 Interferon-induced transmembrane protein 3 Iso 1	-1.8432	0.3888
P09104	ENO2 Gamma-enolase Iso 2	-1.8144	1.2744
Q12996	CSTF3 Cleavage stimulation factor subunit 3 Iso 1	-1.8288	2.8656
Q14980	NUMA1 Nuclear mitotic apparatus protein 1 Iso 2	-1.7064	0.8424
P21589	NT5E 5&apos;-nucleotidase Iso 2	-1.0296	0.2736
P62879	GNB2 Guanine nucleotide-binding protein G(I)/G(S)/G(T) subunit beta-2 Iso 2	-1.7424	0.576
P09382	LGALS1 Galectin-1 Iso 1	-1.7136	0.288
A6NI79	CCDC69 Coiled-coil domain-containing protein 69 Iso 1	-1.7136	0.6912
Q9BXK5	BCL2L13 Bcl-2-like protein 13 Iso 2	-1.0152	0.2952
P07093	SERPINE2 Glia-derived nexin Iso 1	-1.5696	0.2736
P00167	CYB5A Cytochrome b5 Iso 1	-1.6272	0.2592
O00469	PLOD2 Procollagen-lysine_2-oxoglutarate 5-dioxygenase 2 Iso 1	-1.5408	0.288
Q9NVI7	ATAD3A ATPase family AAA domain-containing protein 3A Iso 2	-1.5264	0.432
Q92888	ARHGEF1 Rho guanine nucleotide exchange factor 1 Iso 2	-1.4112	0.9504
P62906	RPL10A 60S ribosomal protein L10a Iso 1	-1.4256	0.144
P46779	RPL28 60S ribosomal protein L28 Iso 2	-1.3968	0.144
Q14257	RCN2 Reticulocalbin-2 Iso 1	-1.3896	0.3528
Q9UIJ7	AK3 GTP:AMP phosphotransferase AK3_ mitochondrial Iso 2	-1.368	0.2304
P00367	GLUD1 Glutamate dehydrogenase 1_ mitochondrial Iso 3	-1.3104	0.1152
Q04837	SSBP1 Single-stranded DNA-binding protein_ mitochondrial Iso 1	-1.368	0.1296
P49419	ALDH7A1 Alpha-aminoadipic semialdehyde dehydrogenase Iso 1	-0.1584	0.3456
P05091	ALDH2 Aldehyde dehydrogenase_ mitochondrial Iso 1	-1.3176	0.1224
P43304	GPD2 Glycerol-3-phosphate dehydrogenase_ mitochondrial Iso 1	-1.3392	0.3168
P51398	DAP3 28S ribosomal protein S29_ mitochondrial Iso 3	0.2016	0.2016
P13667	PDIA4 Protein disulfide-isomerase A4 Iso 1	-1.3104	0.1152
Q6NZI2	CAVIN1 Caveolae-associated protein 1 Iso 1	-1.2672	0.072
Q15293	RCN1 Reticulocalbin-1 Iso 2	-1.26	0.0648
P04216	THY1 Thy-1 membrane glycoprotein Iso 1	-1.2528	0.1008
P55145	MANF Mesencephalic astrocyte-derived neurotrophic factor Iso 1	-1.2528	0.1152
P20340	RAB6A Ras-related protein Rab-6A Iso 4	-1.0584	1.0224
P31937	HIBADH 3-hydroxyisobutyrate dehydrogenase_ mitochondrial Iso 1	-1.2384	0.1584
P54819	AK2 Adenylate kinase 2_ mitochondrial Iso 5	-1.1088	0.3096
Q16647	PTGIS Prostacyclin synthase Iso 1	-1.224	0.2304
A8MW92	PHF20L1 PHD finger protein 20-like protein 1 Iso 4	-1.152	0.2304
Q68DN1	C2orf16 Uncharacterized protein C2orf16 Iso 1	-1.1952	0.1872
Q15758	SLC1A5 Neutral amino acid transporter B(0) Iso 1	-0.2736	0.1584
P24752	ACAT1 Acetyl-CoA acetyltransferase_ mitochondrial Iso 2	-1.1232	0.1008
Q9UBI6	GNG12 Guanine nucleotide-binding protein G(I)/G(S)/G(O) subunit gamma-12 Iso 1	-1.1808	0.1152
Q96DU9	PABPC5 Polyadenylate-binding protein 5 Iso 2	-1.1736	0.1368
Q9Y277	VDAC3 Voltage-dependent anion-selective channel protein 3 Iso 2	-0.6984	0.2376
O95571	ETHE1 Persulfide dioxygenase ETHE1_ mitochondrial Iso 1	-1.1664	0.2304
Q9C0F0	ASXL3 Putative Polycomb group protein ASXL3 Iso 1	-1.1664	0.2016
P26641	EEF1G Elongation factor 1-gamma Iso 1	-0.4248	0.288
Q9NRM7	LATS2 Serine/threonine-protein kinase LATS2 Iso 1	-1.1376	0.2304
Q96D15	RCN3 Reticulocalbin-3 Iso 1	-1.1376	0.1152
P14927	UQCRB Cytochrome b-c1 complex subunit 7 Iso 1	-0.6192	0.2016
Q9P2R7	SUCLA2 Succinate--CoA ligase [ADP-forming] subunit beta_ mitochondrial Iso 2	-1.0296	0.4968
P45880	VDAC2 Voltage-dependent anion-selective channel protein 2 Iso 2	-0.9792	0.072
Q9Y6J0	CABIN1 Calcineurin-binding protein cabin-1 Iso 1	-1.116	0.2304
P30101	PDIA3 Protein disulfide-isomerase A3 Iso 1	-1.1088	0.0288
P04075	ALDOA Fructose-bisphosphate aldolase A Iso 2	-1.1088	0.0576
P07237	P4HB Protein disulfide-isomerase Iso 1	-1.0944	0.0432
P09622	DLD Dihydrolipoyl dehydrogenase_ mitochondrial Iso 3	-1.0656	0.1728
Q16795	NDUFA9 NADH dehydrogenase [ubiquinone] 1 alpha subcomplex subunit 9_ mitochondrial Iso 1	-1.0944	0.2016
P49821	NDUFV1 NADH dehydrogenase [ubiquinone] flavoprotein 1_ mitochondrial Iso 2	-0.4896	0.1584
P24534	EEF1B2 Elongation factor 1-beta Iso 1	-1.0512	0.2016
O75390	CS Citrate synthase_ mitochondrial Iso 1	-1.0512	0.0864
P15144	ANPEP Aminopeptidase N Iso 1	-1.0512	0.072
P07099	EPHX1 Epoxide hydrolase 1 Iso 1	-1.008	0.1152
P07355	ANXA2 Annexin A2 Iso 2	-0.9936	0.0504
P04406	GAPDH Glyceraldehyde-3-phosphate dehydrogenase Iso 1	-0.5328	0.0648
O60313	OPA1 Dynamin-like 120 kDa protein_ mitochondrial Iso 2	-0.972	0.2808
Q9NZM1	MYOF Myoferlin Iso 4	-0.8208	0.0936
Q14697	GANAB Neutral alpha-glucosidase AB Iso 1	-0.936	0.1152
O95292	VAPB Vesicle-associated membrane protein-associated protein B/C Iso 2	-0.8856	0.4032
P00338	LDHA L-lactate dehydrogenase A chain Iso 3	-0.4032	0.072
Q6PCT2	FBXL19 F-box/LRR-repeat protein 19 Iso 1	-0.9288	0.2304
A6NMY6	ANXA2P2 Putative annexin A2-like protein Iso 1	-0.9216	0.0576
O43776	NARS Asparagine--tRNA ligase_ cytoplasmic Iso 1	-0.9216	0.2016
Q96AY3	FKBP10 Peptidyl-prolyl cis-trans isomerase FKBP10 Iso 1	-0.9072	0.1728
Q59H18	TNNI3K Serine/threonine-protein kinase TNNI3K Iso 3	-0.8784	0.3456
Q6ZMY3	SPOCD1 SPOC domain-containing protein 1 Iso 2	-0.5544	0.1872
P56537	EIF6 Eukaryotic translation initiation factor 6 Iso 2	-0.8496	0.3672
Q9NZN4	EHD2 EH domain-containing protein 2 Iso 1	-0.7776	0.1944
O00264	PGRMC1 Membrane-associated progesterone receptor component 1 Iso 2	-0.8928	0.1728
Q96DB9	FXYD5 FXYD domain-containing ion transport regulator 5 Iso 1	-0.8928	0.1584
Q8N6Q1	TMCO5A Transmembrane and coiled-coil domain-containing protein 5A Iso 2	-0.8712	0.3312
P19404	NDUFV2 NADH dehydrogenase [ubiquinone] flavoprotein 2_ mitochondrial Iso 1	-0.8784	0.1152
P27797	CALR Calreticulin Iso 1	-0.8784	0.0288
O43897	TLL1 Tolloid-like protein 1 Iso 2	-0.792	0.324
Q03135	CAV1 Caveolin-1 Iso 2	-0.8712	0.0648
P61026	RAB10 Ras-related protein Rab-10 Iso 1	-0.8784	0.1584
Q96I25	RBM17 Splicing factor 45 Iso 1	-0.864	0.1008
Q6ZS17	RIPOR1 Rho family-interacting cell polarization regulator 1 Iso 1	-0.828	0.2232
P62266	RPS23 40S ribosomal protein S23 Iso 1	-0.8496	1.3104
Q96BQ5	CCDC127 Coiled-coil domain-containing protein 127 Iso 1	-0.8352	0.288
P61421	ATP6V0D1 V-type proton ATPase subunit d 1 Iso 1	-0.8352	0.3744
Q9Y305	ACOT9 Acyl-coenzyme A thioesterase 9_ mitochondrial Iso 2	-0.4896	0.2592
Q9NQC3	RTN4 Reticulon-4 Iso 1	0.1296	0.1872
B1AJZ9	FHAD1 Forkhead-associated domain-containing protein 1 Iso 4	-0.8208	0.3168
Q14108	SCARB2 Lysosome membrane protein 2 Iso 1	-0.8136	0.1512
Q9Y3E5	PTRH2 Peptidyl-tRNA hydrolase 2_ mitochondrial Iso 1	-0.8208	0.1296
Q9Y394	DHRS7 Dehydrogenase/reductase SDR family member 7 Iso 2	-0.7992	0.288
Q6NUK1	SLC25A24 Calcium-binding mitochondrial carrier protein SCaMC-1 Iso 2	-0.2448	0.2016
Q9BWM7	SFXN3 Sideroflexin-3 Iso 1	-0.8064	0.216
Q02818	NUCB1 Nucleobindin-1 Iso 1	-0.792	0.1008
P14625	HSP90B1 Endoplasmin Iso 1	-0.792	0.0432
O96017	CHEK2 Serine/threonine-protein kinase Chk2 Iso 4	-0.7056	0.7632
Q10471	GALNT2 Polypeptide N-acetylgalactosaminyltransferase 2 Iso 1	-0.792	0.4752
Q9H9B4	SFXN1 Sideroflexin-1 Iso 1	-0.7776	0.3456
P13987	CD59 CD59 glycoprotein Iso 1	-0.7776	0.0864
P62136	PPP1CA Serine/threonine-protein phosphatase PP1-alpha catalytic subunit Iso 3	0.5616	0.2304
Q8NBS9	TXNDC5 Thioredoxin domain-containing protein 5 Iso 1	-0.7272	0.108
P40939	HADHA Trifunctional enzyme subunit alpha_ mitochondrial Iso 1	-0.7632	0.0576
P12109	COL6A1 Collagen alpha-1(VI) chain Iso 1	-0.7632	0.072
Q03252	LMNB2 Lamin-B2 Iso 1	-0.7488	0.1728
P11215	ITGAM Integrin alpha-M Iso 2	-0.7488	0.1944
O95202	LETM1 Mitochondrial proton/calcium exchanger protein Iso 1	-0.7488	0.1728
Q5TCS8	AK9 Adenylate kinase 9 Iso 5	-0.576	0.2016
Q9UHD8	SEPT9 Septin-9 Iso 9	-0.5688	0.1584
Q9BS26	ERP44 Endoplasmic reticulum resident protein 44 Iso 1	-0.7344	0.1296
P36957	DLST Dihydrolipoyllysine-residue succinyltransferase component of 2-oxoglutarate dehydrogenase complex_ mitochondrial Iso 2	-0.6984	0.1224
Q9UBG0	MRC2 C-type mannose receptor 2 Iso 1	-0.7344	0.1872
Q9UHA4	LAMTOR3 Ragulator complex protein LAMTOR3 Iso 1	-0.72	0.3024
P08134	RHOC Rho-related GTP-binding protein RhoC Iso 1	-0.6912	0.4464
Q9Y4P3	TBL2 Transducin beta-like protein 2 Iso 1	-0.6912	0.216
O95786	DDX58 Probable ATP-dependent RNA helicase DDX58 Iso 1	-0.6696	0.2088
Q6DD88	ATL3 Atlastin-3 Iso 1	-0.6912	0.1296
O75521	ECI2 Enoyl-CoA delta isomerase 2_ mitochondrial Iso 1	-0.6552	0.4176
P48047	ATP5O ATP synthase subunit O_ mitochondrial Iso 1	-0.6768	0.2016
Q13905	RAPGEF1 Rap guanine nucleotide exchange factor 1 Iso 3	-0.6696	0.2808
P48735	IDH2 Isocitrate dehydrogenase [NADP]_ mitochondrial Iso 1	-0.6408	0.072
Q9NXE4	SMPD4 Sphingomyelin phosphodiesterase 4 Iso 7	-0.648	0.324
Q07021	C1QBP Complement component 1 Q subcomponent-binding protein_ mitochondrial Iso 1	-0.648	0.1152
Q9NVA2	SEPT11 Septin-11 Iso 1	-0.6264	0.0648
P11021	HSPA5 78 kDa glucose-regulated protein Iso 1	-0.6336	0.0288
Q92626	PXDN Peroxidasin homolog Iso 1	-0.6336	0.1296
P69849	NOMO3 Nodal modulator 3 Iso 1	-0.6336	0.288
Q04941	PLP2 Proteolipid protein 2 Iso 1	-0.6336	0.1728
Q02809	PLOD1 Procollagen-lysine_2-oxoglutarate 5-dioxygenase 1 Iso 1	-0.612	0.18
P63027	VAMP2 Vesicle-associated membrane protein 2 Iso 1	-0.6336	0.2592
P22090	RPS4Y1 40S ribosomal protein S4_ Y isoform 1 Iso 1	-0.6336	0.2304
Q8N1F7	NUP93 Nuclear pore complex protein Nup93 Iso 2	-0.612	0.252
Q8NEM2	SHCBP1 SHC SH2 domain-binding protein 1 Iso 1	-0.6192	0.0576
Q9HCH5	SYTL2 Synaptotagmin-like protein 2 Iso 10	0.2952	0.36
Q00653	NFKB2 Nuclear factor NF-kappa-B p100 subunit Iso 4	-0.6048	0.2664
Q9NVJ2	ARL8B ADP-ribosylation factor-like protein 8B Iso 1	-0.6048	0.1296
P31040	SDHA Succinate dehydrogenase [ubiquinone] flavoprotein subunit_ mitochondrial Iso 3	-0.5472	0.1296
Q9Y6R4	MAP3K4 Mitogen-activated protein kinase kinase kinase 4 Iso 1	-0.576	0.1872
Q96BM9	ARL8A ADP-ribosylation factor-like protein 8A Iso 1	-0.576	0.1008
P30042	C21orf33 ES1 protein homolog_ mitochondrial Long	-0.36	0.4248
P19367	HK1 Hexokinase-1 Iso 4	-0.576	0.1224
Q9H2M9	RAB3GAP2 Rab3 GTPase-activating protein non-catalytic subunit Iso 1	-0.576	0.2016
Q58FF3	HSP90B2P Putative endoplasmin-like protein Iso 1	-0.576	0.072
Q6ZRK6	CCDC73 Coiled-coil domain-containing protein 73 Iso 1	-0.576	0.2016
P42704	LRPPRC Leucine-rich PPR motif-containing protein_ mitochondrial Iso 1	-0.576	0.0864
Q9BYX7	POTEKP Putative beta-actin-like protein 3 Iso 1	-0.5616	0.0432
Q9NVP4	DZANK1 Double zinc ribbon and ankyrin repeat-containing protein 1 Iso 1	-0.4896	0.36
O15173	PGRMC2 Membrane-associated progesterone receptor component 2 Iso 1	-0.0504	0.1728
Q13402	MYO7A Unconventional myosin-VIIa Iso 5	-0.5472	0.1872
Q8NF91	SYNE1 Nesprin-1 Iso 9	-0.5472	0.2304
P09601	HMOX1 Heme oxygenase 1 Iso 1	-0.5472	0.0864
Q8TDY4	ASAP3 Arf-GAP with SH3 domain_ ANK repeat and PH domain-containing protein 3 Iso 2	-0.4896	0.2304
Q9Y2Q3	GSTK1 Glutathione S-transferase kappa 1 Iso 4	-0.108	0.3096
P51149	RAB7A Ras-related protein Rab-7a Iso 1	-0.5472	0.1584
P13674	P4HA1 Prolyl 4-hydroxylase subunit alpha-1 Iso 1	-0.5328	0.0576
P26373	RPL13 60S ribosomal protein L13 Iso 1	-0.5472	0.1584
Q5JPE7	NOMO2 Nodal modulator 2 Iso 3	-0.504	0.2304
Q9Y4L1	HYOU1 Hypoxia up-regulated protein 1 Iso 2	-0.5184	0.1008
Q00577	PURA Transcriptional activator protein Pur-alpha Iso 1	-0.5184	0.5616
P08473	MME Neprilysin Iso 1	-0.504	0.3744
Q13129	RLF Zinc finger protein Rlf Iso 1	-0.504	0.1728
Q9BQI6	SLF1 SMC5-SMC6 complex localization factor protein 1 Iso 1	-0.4824	0.3672
P00387	CYB5R3 NADH-cytochrome b5 reductase 3 Iso 3	-0.4896	0.0432
P12235	SLC25A4 ADP/ATP translocase 1 Iso 1	-0.504	0.4896
Q96I99	SUCLG2 Succinate--CoA ligase [GDP-forming] subunit beta_ mitochondrial Iso 2	-0.432	0.18
P62820	RAB1A Ras-related protein Rab-1A Iso 3	-0.4032	0.1152
O95271	TNKS Tankyrase-1 Iso 1	-0.4896	0.216
O94906	PRPF6 Pre-mRNA-processing factor 6 Iso 1	-0.4824	0.36
P18077	RPL35A 60S ribosomal protein L35a Iso 1	-0.4896	0.144
Q92599	SEPT8 Septin-8 Iso 3	0.0288	0.2376
Q8TD47	RPS4Y2 40S ribosomal protein S4_ Y isoform 2 Iso 1	-0.4752	0.2448
P20393	NR1D1 Nuclear receptor subfamily 1 group D member 1 Iso 1	-0.4752	0.1872
P28288	ABCD3 ATP-binding cassette sub-family D member 3 Iso 1	-0.1296	0.4392
P46777	RPL5 60S ribosomal protein L5 Iso 1	-0.4752	0.1152
Q86YT6	MIB1 E3 ubiquitin-protein ligase MIB1 Iso 1	-0.4752	0.3024
Q8NDX5	PHC3 Polyhomeotic-like protein 3 Iso 3	-0.4752	0.3168
Q9BUB7	TMEM70 Transmembrane protein 70_ mitochondrial Iso 1	-0.4752	1.1952
P30040	ERP29 Endoplasmic reticulum resident protein 29 Iso 1	-0.4608	0.5472
P68032	ACTC1 Actin_ alpha cardiac muscle 1 Iso 1	-0.4608	0.0432
Q9Y224	C14orf166 UPF0568 protein C14orf166 Iso 1	-0.4608	0.2736
P68363	TUBA1B Tubulin alpha-1B chain Iso 2	-0.4536	0.2592
Q16181	SEPT7 Septin-7 Iso 1	-0.3168	0.1296
P10515	DLAT Dihydrolipoyllysine-residue acetyltransferase component of pyruvate dehydrogenase complex_ mitochondrial Iso 1	-0.4464	0.2592
P25705	ATP5A1 ATP synthase subunit alpha_ mitochondrial Iso 2	0.144	0.0432
O94905	ERLIN2 Erlin-2 Iso 1	-0.4032	0.2592
Q9NTX5	ECHDC1 Ethylmalonyl-CoA decarboxylase Iso 2	-0.4248	0.3744
P36873	PPP1CC Serine/threonine-protein phosphatase PP1-gamma catalytic subunit Gamma-2	0.1008	0.2016
P40926	MDH2 Malate dehydrogenase_ mitochondrial Iso 1	-0.2448	0.0432
Q71U36	TUBA1A Tubulin alpha-1A chain Iso 1	-0.4104	0.2232
P12111	COL6A3 Collagen alpha-3(VI) chain Iso 5	0.2448	0.0864
P35241	RDX Radixin Iso 5	-0.432	0.5184
Q9UHG3	PCYOX1 Prenylcysteine oxidase 1 Iso 2	-0.4176	0.1944
Q8NHW5	RPLP0P6 60S acidic ribosomal protein P0-like Iso 1	-0.432	0.0576
P18085	ARF4 ADP-ribosylation factor 4 Iso 1	-0.432	0.3456
P61619	SEC61A1 Protein transport protein Sec61 subunit alpha isoform 1 Iso 1	-0.0144	0.216
P62899	RPL31 60S ribosomal protein L31 Iso 3	-0.432	0.1296
Q9BSJ8	ESYT1 Extended synaptotagmin-1 Iso 1	-0.1944	0.3096
Q9BTV4	TMEM43 Transmembrane protein 43 Iso 1	-0.432	0.1008
P80303	NUCB2 Nucleobindin-2 Iso 1	-0.4032	0.144
Q12797	ASPH Aspartyl/asparaginyl beta-hydroxylase Iso 1	0.3024	0.144
O95299	NDUFA10 NADH dehydrogenase [ubiquinone] 1 alpha subcomplex subunit 10_ mitochondrial Iso 2	-0.4176	0.252
P21796	VDAC1 Voltage-dependent anion-selective channel protein 1 Iso 1	-0.4176	0.072
P05388	RPLP0 60S acidic ribosomal protein P0 Iso 2	-0.4176	0.0504
P49448	GLUD2 Glutamate dehydrogenase 2_ mitochondrial Iso 1	-0.4176	0.1152
Q5T6S3	PHF19 PHD finger protein 19 Iso 2	-0.3744	1.1808
P27144	AK4 Adenylate kinase 4_ mitochondrial Iso 1	-0.4032	0.7776
P05556	ITGB1 Integrin beta-1 Iso 1	-0.2304	0.1008
P30044	PRDX5 Peroxiredoxin-5_ mitochondrial Cytoplasmic+peroxisomal	0.5544	0.1656
P14649	MYL6B Myosin light chain 6B Iso 1	-0.4032	0.2016
Q5JRX3	PITRM1 Presequence protease_ mitochondrial Iso 3	0.7776	0.1296
P31946	YWHAB 14-3-3 protein beta/alpha Short	-0.3672	0.2088
Q9BQE3	TUBA1C Tubulin alpha-1C chain Iso 1	-0.3888	0.2736
Q14141	SEPT6 Septin-6 IV	-0.072	0.108
P61247	RPS3A 40S ribosomal protein S3a Iso 1	-0.3888	0.0864
P08559	PDHA1 Pyruvate dehydrogenase E1 component subunit alpha_ somatic form_ mitochondrial Iso 3	-0.324	0.252
Q86UL8	MAGI2 Membrane-associated guanylate kinase_ WW and PDZ domain-containing protein 2 Iso 2	-0.3888	0.1728
P14209	CD99 CD99 antigen Iso 3	-0.3816	0.288
Q9UJZ1	STOML2 Stomatin-like protein 2_ mitochondrial Iso 1	-0.3672	0.1152
O75396	SEC22B Vesicle-trafficking protein SEC22b Iso 1	-0.3888	0.1152
P67812	SEC11A Signal peptidase complex catalytic subunit SEC11A Iso 4	-0.3528	0.54
Q15006	EMC2 ER membrane protein complex subunit 2 Iso 1	-0.3744	0.216
P51659	HSD17B4 Peroxisomal multifunctional enzyme type 2 Iso 2	-0.1872	0.3168
P59998	ARPC4 Actin-related protein 2/3 complex subunit 4 Iso 2	-0.3456	0.2448
Q70UQ0	IKBIP Inhibitor of nuclear factor kappa-B kinase-interacting protein Iso 1	-0.3312	0.0864
P05386	RPLP1 60S acidic ribosomal protein P1 Iso 1	-0.36	0.1152
P60033	CD81 CD81 antigen Iso 1	-0.3456	0.1296
Q92665	MRPS31 28S ribosomal protein S31_ mitochondrial Iso 1	-0.3456	0.216
Q6S8J3	POTEE POTE ankyrin domain family member E Iso 1	-0.3456	0.0576
Q9C075	KRT23 Keratin_ type I cytoskeletal 23 Iso 2	-0.3168	0.1584
P27348	YWHAQ 14-3-3 protein theta Iso 1	-0.3456	0.2016
Q6PIU2	NCEH1 Neutral cholesterol ester hydrolase 1 Iso 2	-0.3168	0.216
Q8NDW8	TTC21A Tetratricopeptide repeat protein 21A Iso 6	-0.288	0.2376
A5A3E0	POTEF POTE ankyrin domain family member F Iso 1	-0.3312	0.0432
Q5ZPR3	CD276 CD276 antigen Iso 3	-0.2304	0.7344
Q9Y512	SAMM50 Sorting and assembly machinery component 50 homolog Iso 1	-0.3312	0.1584
O60762	DPM1 Dolichol-phosphate mannosyltransferase subunit 1 Iso 1	-0.3312	0.3456
Q9NP92	MRPS30 39S ribosomal protein S30_ mitochondrial Iso 1	-0.3312	0.648
Q562R1	ACTBL2 Beta-actin-like protein 2 Iso 1	-0.3168	0.0432
Q9P035	HACD3 Very-long-chain (3R)-3-hydroxyacyl-CoA dehydratase 3 Iso 2	-0.3168	0.18
Q7Z7H5	TMED4 Transmembrane emp24 domain-containing protein 4 Iso 3	-0.3168	0.2592
P07954	FH Fumarate hydratase_ mitochondrial Mitochondrial	-0.3096	0.108
Q15836	VAMP3 Vesicle-associated membrane protein 3 Iso 1	-0.3168	0.5472
Q14995	NR1D2 Nuclear receptor subfamily 1 group D member 2 Iso 1	-0.3168	0.2304
P10412	HIST1H1E Histone H1.4 Iso 1	-0.3024	0.8208
Q7L7L0	HIST3H2A Histone H2A type 3 Iso 1	-0.3024	0.1296
Q53GQ0	HSD17B12 Very-long-chain 3-oxoacyl-CoA reductase Iso 1	0.6408	0.4896
P39656	DDOST Dolichyl-diphosphooligosaccharide--protein glycosyltransferase 48 kDa subunit Iso 2	-0.0288	0.072
Q92896	GLG1 Golgi apparatus protein 1 Iso 2	-0.2592	0.1296
P05141	SLC25A5 ADP/ATP translocase 2 Iso 1	-0.288	0.1152
P20671	HIST1H2AD Histone H2A type 1-D Iso 1	-0.288	0.1008
P31930	UQCRC1 Cytochrome b-c1 complex subunit 1_ mitochondrial Iso 1	-0.288	0.1008
O75489	NDUFS3 NADH dehydrogenase [ubiquinone] iron-sulfur protein 3_ mitochondrial Iso 1	-0.288	0.2304
P84077	ARF1 ADP-ribosylation factor 1 Iso 1	-0.2736	0.2304
Q13405	MRPL49 39S ribosomal protein L49_ mitochondrial Iso 1	-0.2736	0.5328
P04899	GNAI2 Guanine nucleotide-binding protein G(i) subunit alpha-2 Iso 6	-0.2736	0.1152
P61204	ARF3 ADP-ribosylation factor 3 Iso 1	-0.2592	0.216
P08238	HSP90AB1 Heat shock protein HSP 90-beta Iso 1	-0.2592	0.1008
Q15019	SEPT2 Septin-2 Iso 3	-0.2448	0.072
P62249	RPS16 40S ribosomal protein S16 Iso 1	-0.2592	0.1152
P04844	RPN2 Dolichyl-diphosphooligosaccharide--protein glycosyltransferase subunit 2 Iso 2	-0.252	0.0432
O43169	CYB5B Cytochrome b5 type B Iso 1	-0.2448	0.1728
P21964	COMT Catechol O-methyltransferase Soluble	-0.2448	0.1008
P42765	ACAA2 3-ketoacyl-CoA thiolase_ mitochondrial Iso 1	-0.2448	0.1008
P84085	ARF5 ADP-ribosylation factor 5 Iso 1	-0.2448	0.288
P63173	RPL38 60S ribosomal protein L38 Iso 1	-0.2448	0.2736
Q04917	YWHAH 14-3-3 protein eta Iso 1	-0.2304	0.2304
Q99798	ACO2 Aconitate hydratase_ mitochondrial Iso 1	-0.2304	0.072
Q02218	OGDH 2-oxoglutarate dehydrogenase_ mitochondrial Iso 2	0.144	0.2016
Q9GZP8	IMUP Immortalization up-regulated protein Iso 2	-0.216	0.1872
Q86Y82	STX12 Syntaxin-12 Iso 1	-0.216	0.4464
P55084	HADHB Trifunctional enzyme subunit beta_ mitochondrial Iso 2	-0.2016	0.0864
P39023	RPL3 60S ribosomal protein L3 Iso 1	-0.216	0.2016
Q05639	EEF1A2 Elongation factor 1-alpha 2 Iso 1	-0.216	0.0864
P61586	RHOA Transforming protein RhoA Iso 1	-0.2016	0.2592
P36542	ATP5C1 ATP synthase subunit gamma_ mitochondrial Heart	-0.1296	0.1296
P11177	PDHB Pyruvate dehydrogenase E1 component subunit beta_ mitochondrial Iso 1	-0.1872	0.144
O75477	ERLIN1 Erlin-1 Iso 1	-0.1872	0.2736
P23284	PPIB Peptidyl-prolyl cis-trans isomerase B Iso 1	-0.1872	0.0432
P30050	RPL12 60S ribosomal protein L12 Iso 2	-0.18	0.072
P61981	YWHAG 14-3-3 protein gamma Iso 1	-0.1872	0.2448
Q5JRC9	FAM47A Protein FAM47A Iso 1	-0.1872	0.2304
P30049	ATP5D ATP synthase subunit delta_ mitochondrial Iso 1	-0.1872	0.216
Q8NBJ5	COLGALT1 Procollagen galactosyltransferase 1 Iso 1	-0.1728	0.6192
O60568	PLOD3 Procollagen-lysine_2-oxoglutarate 5-dioxygenase 3 Iso 1	-0.1728	0.288
O43493	TGOLN2 Trans-Golgi network integral membrane protein 2 TGN48	-0.1728	0.4392
P16070	CD44 CD44 antigen Iso 4	-0.036	0.4752
P56181	NDUFV3 NADH dehydrogenase [ubiquinone] flavoprotein 3_ mitochondrial Iso 2	-0.1584	0.4608
P27816	MAP4 Microtubule-associated protein 4 Iso 7	-0.0576	0.1152
P28331	NDUFS1 NADH-ubiquinone oxidoreductase 75 kDa subunit_ mitochondrial Iso 5	-0.1584	0.0864
O43181	NDUFS4 NADH dehydrogenase [ubiquinone] iron-sulfur protein 4_ mitochondrial Iso 1	-0.1584	0.3024
P38117	ETFB Electron transfer flavoprotein subunit beta Iso 2	-0.1512	0.2016
P07197	NEFM Neurofilament medium polypeptide Iso 2	-0.144	0.0432
P43307	SSR1 Translocon-associated protein subunit alpha Iso 2	0.2808	0.1296
P12236	SLC25A6 ADP/ATP translocase 3 Iso 1	-0.144	0.0864
P17661	DES Desmin Iso 1	-0.1296	0.0576
P12036	NEFH Neurofilament heavy polypeptide Iso 2	-0.1296	0.0504
Q7Z434	MAVS Mitochondrial antiviral-signaling protein Iso 1	0.6336	0.5616
P07196	NEFL Neurofilament light polypeptide Iso 1	-0.1296	0.0432
Q16352	INA Alpha-internexin Iso 1	-0.1296	0.0432
Q9P0L0	VAPA Vesicle-associated membrane protein-associated protein A Iso 1	1.5336	0.4896
Q9UPT6	MAPK8IP3 C-Jun-amino-terminal kinase-interacting protein 3 Iso 1	-0.1152	0.7056
P16615	ATP2A2 Sarcoplasmic/endoplasmic reticulum calcium ATPase 2 Iso 4	-0.0864	0.072
Q8WXW3	PIBF1 Progesterone-induced-blocking factor 1 Iso 1	-0.1152	0.0864
Q00325	SLC25A3 Phosphate carrier protein_ mitochondrial B	0.036	0.7776
P10809	HSPD1 60 kDa heat shock protein_ mitochondrial Iso 1	0.1584	0.0864
Q6PJG2	ELMSAN1 ELM2 and SANT domain-containing protein 1 Iso 1	-0.1152	0.288
P45877	PPIC Peptidyl-prolyl cis-trans isomerase C Iso 1	-0.1152	0.2592
P61009	SPCS3 Signal peptidase complex subunit 3 Iso 1	-0.1008	0.1872
Q8TCT9	HM13 Minor histocompatibility antigen H13 Iso 2	-0.1008	2.0736
P14314	PRKCSH Glucosidase 2 subunit beta Iso 2	-0.0864	0.2304
Q86SR1	GALNT10 Polypeptide N-acetylgalactosaminyltransferase 10 Iso 1	-0.0936	0.2088
P14406	COX7A2 Cytochrome c oxidase subunit 7A2_ mitochondrial Iso 1	-0.1008	0.2736
P63261	ACTG1 Actin_ cytoplasmic 2 Iso 1	-0.1008	0.0288
Q13275	SEMA3F Semaphorin-3F Iso 2	-0.0504	0.4104
P41219	PRPH Peripherin Iso 2	0.0504	0.0576
P12110	COL6A2 Collagen alpha-2(VI) chain 2C2A	-0.072	0.1728
Q6WKZ4	RAB11FIP1 Rab11 family-interacting protein 1 Iso 2	-0.0576	0.1584
Q6ZU64	CFAP65 Cilia- and flagella-associated protein 65 Iso 1	-0.0864	0.2304
Q9H9S3	SEC61A2 Protein transport protein Sec61 subunit alpha isoform 2 Iso 3	-0.072	0.1584
P31947	SFN 14-3-3 protein sigma Iso 2	0.4248	0.2376
P11217	PYGM Glycogen phosphorylase_ muscle form Iso 2	-0.072	0.0144
P11216	PYGB Glycogen phosphorylase_ brain form Iso 1	-0.072	0.0288
P46781	RPS9 40S ribosomal protein S9 Iso 1	-0.072	0.1008
P08670	VIM Vimentin Iso 1	-0.072	0.0288
P35221	CTNNA1 Catenin alpha-1 Iso 3	-0.0144	0.2304
P62861	FAU 40S ribosomal protein S30 Iso 1	-0.0576	0.6768
Q9UPQ0	LIMCH1 LIM and calponin homology domains-containing protein 1 Iso 3	-0.0576	0.2016
P07996	THBS1 Thrombospondin-1 Iso 1	0.0864	0.18
P0C7P4	UQCRFS1P1 Putative cytochrome b-c1 complex subunit Rieske-like protein 1 Iso 1	-0.0576	0.1728
P06737	PYGL Glycogen phosphorylase_ liver form Iso 2	-0.0432	0.1224
P0CG39	POTEJ POTE ankyrin domain family member J Iso 1	-0.0432	0.072
P62987	UBA52 Ubiquitin-60S ribosomal protein L40 Iso 1	-0.0432	0.0576
P63104	YWHAZ 14-3-3 protein zeta/delta Iso 2	-0.0216	0.216
Q9HDC9	APMAP Adipocyte plasma membrane-associated protein Iso 2	-0.036	0.1368
P47985	UQCRFS1 Cytochrome b-c1 complex subunit Rieske_ mitochondrial Iso 1	-0.0288	0.2448
P62753	RPS6 40S ribosomal protein S6 Iso 1	-0.0288	0.1152
O15085	ARHGEF11 Rho guanine nucleotide exchange factor 11 Iso 2	0.6624	0.7272
Q71UM5	RPS27L 40S ribosomal protein S27-like Iso 1	-0.0288	0.8208
Q16698	DECR1 2_4-dienoyl-CoA reductase_ mitochondrial Iso 2	-0.0216	0.7776
P63128	ERVK-9 Endogenous retrovirus group K member 9 Pol protein Iso 1	-0.0288	0.4032
P0CG48	UBC Polyubiquitin-C Iso 1	-0.0288	0.0432
Q6ZT12	UBR3 E3 ubiquitin-protein ligase UBR3 Iso 1	-0.0216	0.36
Q52LW3	ARHGAP29 Rho GTPase-activating protein 29 Iso 1	-0.0288	0.36
P0CG47	UBB Polyubiquitin-B Iso 1	-0.0288	0.0576
O94925	GLS Glutaminase kidney isoform_ mitochondrial Iso 2	0.072	0.0864
P62979	RPS27A Ubiquitin-40S ribosomal protein S27a Iso 1	-0.0288	0.0432
P16333	NCK1 Cytoplasmic protein NCK1 Iso 2	-0.0288	0.2304
P38646	HSPA9 Stress-70 protein_ mitochondrial Iso 1	-0.0288	0.0576
Q8NE09	RGS22 Regulator of G-protein signaling 22 Iso 1	-0.0144	0.4032
P36776	LONP1 Lon protease homolog_ mitochondrial Iso 2	-0.0288	0.1296
Q8IVV2	LOXHD1 Lipoxygenase homology domain-containing protein 1 Iso 4	0.0072	0.3888
P62917	RPL8 60S ribosomal protein L8 Iso 1	-0.0144	0.1008
Q9UGP8	SEC63 Translocation protein SEC63 homolog Iso 1	-0.0144	0.1872
P0CG38	POTEI POTE ankyrin domain family member I Iso 1	-0.0144	0.0864
P49257	LMAN1 Protein ERGIC-53 Iso 1	-0.0144	0.1008
Q6IAA8	LAMTOR1 Ragulator complex protein LAMTOR1 Iso 1	-0.0144	0.216
P04843	RPN1 Dolichyl-diphosphooligosaccharide--protein glycosyltransferase subunit 1 Iso 1	0	0.0288
Q32P28	P3H1 Prolyl 3-hydroxylase 1 Iso 2	0.2664	0.1584
Q71DI3	HIST2H3A;HIST2H3C;HIST2H3D Histone H3.2 Iso 1	0	0.1152
O14983	ATP2A1 Sarcoplasmic/endoplasmic reticulum calcium ATPase 1 Iso 3	0	0.1296
O95782	AP2A1 AP-2 complex subunit alpha-1 B	0.0504	0.3096
P61106	RAB14 Ras-related protein Rab-14 Iso 1	0.0144	0.288
P30084	ECHS1 Enoyl-CoA hydratase_ mitochondrial Iso 1	0.0144	0.0864
Q02978	SLC25A11 Mitochondrial 2-oxoglutarate/malate carrier protein Iso 2	0.0144	0.2016
P36551	CPOX Oxygen-dependent coproporphyrinogen-III oxidase_ mitochondrial Iso 1	0.0936	0.8064
Q02543	RPL18A 60S ribosomal protein L18a Iso 1	0.0288	0.1152
P42766	RPL35 60S ribosomal protein L35 Iso 1	0.0288	0.3024
P22392	NME2 Nucleoside diphosphate kinase B Iso 3	0.0288	0.36
P05023	ATP1A1 Sodium/potassium-transporting ATPase subunit alpha-1 Iso 4	0.072	0.1728
Q9ULE0	WWC3 Protein WWC3 Iso 2	0.0864	0.1512
Q99623	PHB2 Prohibitin-2 Iso 1	0.0792	0.108
P15880	RPS2 40S ribosomal protein S2 Iso 1	0.0432	0.144
Q9Y5M8	SRPRB Signal recognition particle receptor subunit beta Iso 1	0.0576	0.1296
Q06830	PRDX1 Peroxiredoxin-1 Iso 1	0.0576	0.0864
P62857	RPS28 40S ribosomal protein S28 Iso 1	0.0576	0.0576
O75380	NDUFS6 NADH dehydrogenase [ubiquinone] iron-sulfur protein 6_ mitochondrial Iso 1	0.0576	0.8496
P13804	ETFA Electron transfer flavoprotein subunit alpha_ mitochondrial Iso 1	0.4536	0.1368
P60866	RPS20 40S ribosomal protein S20 Iso 2	0.0792	0.0576
Q15155	NOMO1 Nodal modulator 1 Iso 1	0.072	0.1008
P46776	RPL27A 60S ribosomal protein L27a Iso 1	0.072	0.1584
Q16695	HIST3H3 Histone H3.1t Iso 1	0.072	0.2016
O15144	ARPC2 Actin-related protein 2/3 complex subunit 2 Iso 1	0.0864	0.1152
P62244	RPS15A 40S ribosomal protein S15a Iso 1	0.0864	0.1584
O14494	PLPP1 Phospholipid phosphatase 1 Iso 1	0.0936	0.288
Q05682	CALD1 Caldesmon Iso 6	0.1368	0.0432
A6NC98	CCDC88B Coiled-coil domain-containing protein 88B Iso 1	0.4536	0.1728
Q07020	RPL18 60S ribosomal protein L18 Iso 2	0.108	0.0936
P46782	RPS5 40S ribosomal protein S5 Iso 1	0.1008	0.072
P30876	POLR2B DNA-directed RNA polymerase II subunit RPB2 Iso 1	0.1152	0.9504
O15143	ARPC1B Actin-related protein 2/3 complex subunit 1B Iso 1	0.1152	0.2016
P27824	CANX Calnexin Iso 2	0.1152	0.0576
Q92928	RAB1C Putative Ras-related protein Rab-1C Iso 1	0.1152	0.144
Q7KZF4	SND1 Staphylococcal nuclease domain-containing protein 1 Iso 1	0.144	0.072
Q8IY63	AMOTL1 Angiomotin-like protein 1 Iso 1	0.3528	0.1584
P27635	RPL10 60S ribosomal protein L10 Iso 1	0.144	0.1584
P06576	ATP5B ATP synthase subunit beta_ mitochondrial Iso 1	0.1584	0.072
O15460	P4HA2 Prolyl 4-hydroxylase subunit alpha-2 IIa	0.1584	0.0504
Q15738	NSDHL Sterol-4-alpha-carboxylate 3-dehydrogenase_ decarboxylating Iso 1	0.1584	0.3312
P62269	RPS18 40S ribosomal protein S18 Iso 1	0.1584	0.072
P14854	COX6B1 Cytochrome c oxidase subunit 6B1 Iso 1	0.1728	0.216
P35749	MYH11 Myosin-11 Iso 4	0.2016	0.0648
Q15056	EIF4H Eukaryotic translation initiation factor 4H Long	0.1872	0.4032
P25398	RPS12 40S ribosomal protein S12 Iso 1	0.1728	0.1152
P60660	MYL6 Myosin light polypeptide 6 Non-muscle	0.18	0.0936
Q02878	RPL6 60S ribosomal protein L6 Iso 1	0.1872	0.0576
P23634	ATP2B4 Plasma membrane calcium-transporting ATPase 4 ZK	0.2088	0.1152
Q92930	RAB8B Ras-related protein Rab-8B Iso 1	0.1872	0.3168
P49411	TUFM Elongation factor Tu_ mitochondrial Iso 1	0.1872	0.072
P55072	VCP Transitional endoplasmic reticulum ATPase Iso 1	0.1872	0.1296
P62854	RPS26 40S ribosomal protein S26 Iso 1	0.1872	0.1152
Q00688	FKBP3 Peptidyl-prolyl cis-trans isomerase FKBP3 Iso 1	0.1872	0.144
Q96AG4	LRRC59 Leucine-rich repeat-containing protein 59 Iso 1	0.2016	0.1152
P39019	RPS19 40S ribosomal protein S19 Iso 1	0.2016	0.0864
Q96SN8	CDK5RAP2 CDK5 regulatory subunit-associated protein 2 Iso 2	0.216	0.0864
Q9H0U4	RAB1B Ras-related protein Rab-1B Iso 1	0.2016	0.1152
P08865	RPSA 40S ribosomal protein SA Iso 1	0.216	0.1008
Q6UB35	MTHFD1L Monofunctional C1-tetrahydrofolate synthase_ mitochondrial Iso 1	0.216	0.1728
P61006	RAB8A Ras-related protein Rab-8A Iso 2	0.2592	0.2808
P46977	STT3A Dolichyl-diphosphooligosaccharide--protein glycosyltransferase subunit STT3A Iso 1	0.2808	0.1296
P0DP25	CALM3 Calmodulin-3 Iso 1	0.2304	0.1728
P34897	SHMT2 Serine hydroxymethyltransferase_ mitochondrial Iso 2	0.3168	0.144
A2RUR9	CCDC144A Coiled-coil domain-containing protein 144A Iso 1	1.8	0.5544
Q8WTU0	DDI1 Protein DDI1 homolog 1 Iso 1	0.2304	1.2528
P55809	OXCT1 Succinyl-CoA:3-ketoacid coenzyme A transferase 1_ mitochondrial Iso 1	0.2304	0.144
Q9P2E9	RRBP1 Ribosome-binding protein 1 Iso 1	0.2304	0.0288
A7E2F4	GOLGA8A Golgin subfamily A member 8A Iso 1	0.2376	0.108
P23396	RPS3 40S ribosomal protein S3 Iso 1	0.252	0.1008
P30048	PRDX3 Thioredoxin-dependent peroxide reductase_ mitochondrial Iso 2	0.2592	0.0936
Q86UP2	KTN1 Kinectin Iso 2	0.2592	0.0792
P05387	RPLP2 60S acidic ribosomal protein P2 Iso 1	0.2448	0.0432
Q969V3	NCLN Nicalin Iso 1	0.252	0.6336
P62888	RPL30 60S ribosomal protein L30 Iso 1	0.2448	0.1008
Q8IWJ2	GCC2 GRIP and coiled-coil domain-containing protein 2 Iso 1	0.6192	0.3888
A8MQT2	GOLGA8B Golgin subfamily A member 8B Iso 2	0.6624	0.1368
Q6NXT2	H3F3C Histone H3.3C Iso 1	0.2592	0.3456
Q8WWI1	LMO7 LIM domain only protein 7 Iso 3	0.3024	0.1152
P61353	RPL27 60S ribosomal protein L27 Iso 1	0.2592	0.0576
O75947	ATP5H ATP synthase subunit d_ mitochondrial Iso 1	0.4032	0.2088
Q14165	MLEC Malectin Iso 1	0.2736	0.288
P00505	GOT2 Aspartate aminotransferase_ mitochondrial Iso 2	0.3096	0.0792
Q86UE4	MTDH Protein LYRIC Iso 1	0.2736	0.072
P62081	RPS7 40S ribosomal protein S7 Iso 1	0.2736	0.0576
Q96C36	PYCR2 Pyrroline-5-carboxylate reductase 2 Iso 1	0.2736	0.5616
Q5T7B8	KIF24 Kinesin-like protein KIF24 Iso 2	0.2808	0.1584
Q16891	IMMT MICOS complex subunit MIC60 Iso 4	0.2952	0.072
P13639	EEF2 Elongation factor 2 Iso 1	0.3024	0.072
Q5JNZ5	RPS26P11 Putative 40S ribosomal protein S26-like 1 Iso 1	0.3024	0.1152
Q9Y2B0	CNPY2 Protein canopy homolog 2 Iso 1	0.6552	0.108
Q14554	PDIA5 Protein disulfide-isomerase A5 Iso 1	0.3024	0.1296
Q99759	MAP3K3 Mitogen-activated protein kinase kinase kinase 3 Iso 2	0.3384	0.108
Q9GZY8	MFF Mitochondrial fission factor Iso 2	0.432	0.4464
P56539	CAV3 Caveolin-3 Iso 1	0.3312	0.144
P56385	ATP5I ATP synthase subunit e_ mitochondrial Iso 1	0.3312	0.6624
P56134	ATP5J2 ATP synthase subunit f_ mitochondrial Iso 4	0.3456	0.2448
Q9H8Y8	GORASP2 Golgi reassembly-stacking protein 2 Iso 1	0.3456	0.576
P60953	CDC42 Cell division control protein 42 homolog Iso 2	0.3456	0.2592
P22695	UQCRC2 Cytochrome b-c1 complex subunit 2_ mitochondrial Iso 1	0.3456	0.2448
Q86Y56	DNAAF5 Dynein assembly factor 5_ axonemal Iso 1	0.3888	1.836
P09972	ALDOC Fructose-bisphosphate aldolase C Iso 1	0.36	0.0864
Q9Y2T7	YBX2 Y-box-binding protein 2 Iso 1	0.36	0.072
Q8NC51	SERBP1 Plasminogen activator inhibitor 1 RNA-binding protein Iso 4	0.4176	0.1008
P50454	SERPINH1 Serpin H1 Iso 1	0.36	0.0432
P49321	NASP Nuclear autoantigenic sperm protein Iso 1	0.36	0.8352
P02461	COL3A1 Collagen alpha-1(III) chain Iso 1	1.3392	0.144
P26038	MSN Moesin Iso 1	0.3744	0.1008
P0DP24	CALM2 Calmodulin-2 Iso 1	0.3744	0.072
P0DP23	CALM1 Calmodulin-1 Iso 1	0.3744	0.0864
P16989	YBX3 Y-box-binding protein 3 Iso 1	0.4176	0.072
P62701	RPS4X 40S ribosomal protein S4_ X isoform Iso 1	0.3744	0.1152
Q07065	CKAP4 Cytoskeleton-associated protein 4 Iso 1	0.3744	0.0288
Q6ZXV5	TMTC3 Transmembrane and TPR repeat-containing protein 3 Iso 2	0.3888	0.072
Q6N069	NAA16 N-alpha-acetyltransferase 16_ NatA auxiliary subunit Iso 4	0.4032	0.0864
P62913	RPL11 60S ribosomal protein L11 Iso 2	0.3888	0.0864
O60506	SYNCRIP Heterogeneous nuclear ribonucleoprotein Q Iso 5	0.7056	0.0864
Q00341	HDLBP Vigilin Iso 2	0.468	0.0504
Q6GQQ9	OTUD7B OTU domain-containing protein 7B Iso 1	0.4032	0.4032
P62280	RPS11 40S ribosomal protein S11 Iso 1	0.4032	0.0864
P20020	ATP2B1 Plasma membrane calcium-transporting ATPase 1 B	0.4536	0.1368
Q60I27	ALS2CL ALS2 C-terminal-like protein Iso 5	0.432	0.2952
Q9BRR6	ADPGK ADP-dependent glucokinase Iso 6	0.4464	0.4464
Q6YHK3	CD109 CD109 antigen Iso 1	0.4392	0.2952
P47914	RPL29 60S ribosomal protein L29 Iso 1	0.432	0.7344
P18124	RPL7 60S ribosomal protein L7 Iso 1	0.432	0.0576
Q9Y3I0	RTCB tRNA-splicing ligase RtcB homolog Iso 1	0.432	0.1584
P61019	RAB2A Ras-related protein Rab-2A Iso 2	0.432	0.1296
P62277	RPS13 40S ribosomal protein S13 Iso 1	0.432	0.144
Q504Q3	PAN2 PAB-dependent poly(A)-specific ribonuclease subunit PAN2 Iso 3	0.432	0.2304
Q6P9G9	ZNF449 Zinc finger protein 449 Iso 3	0.4608	0.7776
P67809	YBX1 Nuclease-sensitive element-binding protein 1 Iso 1	0.4464	0.072
Q99714	HSD17B10 3-hydroxyacyl-CoA dehydrogenase type-2 Iso 1	0.4608	0.1728
Q53GI3	ZNF394 Zinc finger protein 394 Iso 1	0.4752	0.3024
O14950	MYL12B Myosin regulatory light chain 12B Iso 1	0.4608	0.072
P61604	HSPE1 10 kDa heat shock protein_ mitochondrial Iso 1	0.4608	0.1872
P62851	RPS25 40S ribosomal protein S25 Iso 1	0.4752	0.5616
P68133	ACTA1 Actin_ alpha skeletal muscle Iso 1	0.4752	0.0432
P08195	SLC3A2 4F2 cell-surface antigen heavy chain Iso 3	0.4824	0.216
Q9HAV7	GRPEL1 GrpE protein homolog 1_ mitochondrial Iso 1	0.4752	0.1152
P62736	ACTA2 Actin_ aortic smooth muscle Iso 1	0.4752	0.0288
P19105	MYL12A Myosin regulatory light chain 12A Iso 1	0.4752	0.072
Q5VTE0	EEF1A1P5 Putative elongation factor 1-alpha-like 3 Iso 1	0.4752	0.0432
P10606	COX5B Cytochrome c oxidase subunit 5B_ mitochondrial Iso 1	0.4752	2.4192
P51571	SSR4 Translocon-associated protein subunit delta Iso 1	0.4752	0.1008
Q9UNX3	RPL26L1 60S ribosomal protein L26-like 1 Iso 1	0.4752	0.144
P08708	RPS17 40S ribosomal protein S17 Iso 1	0.4896	0.1152
P63267	ACTG2 Actin_ gamma-enteric smooth muscle Iso 2	0.4896	0.0432
P07919	UQCRH Cytochrome b-c1 complex subunit 6_ mitochondrial Iso 1	0.504	0.1152
P68431	HIST1H3A;HIST1H3B;HIST1H3C;HIST1H3D;HIST1H3E;HIST1H3F;HIST1H3G;HIST1H3H;HIST1H3I;HIST1H3J Histone H3.1 Iso 1	0.504	0.1872
P68104	EEF1A1 Elongation factor 1-alpha 1 Iso 1	0.5112	0.0504
P63244	RACK1 Receptor of activated protein C kinase 1 Iso 1	0.5184	0.0576
P18621	RPL17 60S ribosomal protein L17 Iso 3	0.5184	0.0576
P84095	RHOG Rho-related GTP-binding protein RhoG Iso 1	0.5184	1.6128
O75306	NDUFS2 NADH dehydrogenase [ubiquinone] iron-sulfur protein 2_ mitochondrial Iso 2	0.5328	0.36
P29966	MARCKS Myristoylated alanine-rich C-kinase substrate Iso 1	0.5184	0.3312
Q8N183	NDUFAF2 NADH dehydrogenase [ubiquinone] 1 alpha subcomplex assembly factor 2 Iso 1	0.5184	0.576
Q13283	G3BP1 Ras GTPase-activating protein-binding protein 1 Iso 1	0.5184	0.3168
P62241	RPS8 40S ribosomal protein S8 Iso 1	0.5184	0.2736
Q93045	STMN2 Stathmin-2 Iso 1	0.5472	0.4392
O15145	ARPC3 Actin-related protein 2/3 complex subunit 3 Iso 1	0.5472	0.2592
P62829	RPL23 60S ribosomal protein L23 Iso 1	0.5472	0.1296
Q8N283	ANKRD35 Ankyrin repeat domain-containing protein 35 Iso 1	0.5472	0.144
Q5TZA2	CROCC Rootletin Iso 1	2.196	0.9144
Q7Z406	MYH14 Myosin-14 Iso 5	0.6912	0.072
P19338	NCL Nucleolin Iso 1	0.5472	0.36
O15523	DDX3Y ATP-dependent RNA helicase DDX3Y Iso 2	0.5472	0.144
P84243	H3F3A;H3F3B Histone H3.3 Iso 1	0.5472	0.1728
P62140	PPP1CB Serine/threonine-protein phosphatase PP1-beta catalytic subunit Iso 1	0.5616	0.1872
P11940	PABPC1 Polyadenylate-binding protein 1 Iso 1	0.5688	0.1008
Q9NX62	IMPAD1 Inositol monophosphatase 3 Iso 1	0.5616	0.3744
P35232	PHB Prohibitin Iso 1	0.8568	0.1008
Q3SY69	ALDH1L2 Mitochondrial 10-formyltetrahydrofolate dehydrogenase Iso 3	0.7632	0.2016
P32969	RPL9;RPL9P7;RPL9P8;RPL9P9 60S ribosomal protein L9 Iso 1	0.5904	0.0432
P62424	RPL7A 60S ribosomal protein L7a Iso 1	0.5904	0.144
O60437	PPL Periplakin Iso 1	0.5904	1.3392
P13073	COX4I1 Cytochrome c oxidase subunit 4 isoform 1_ mitochondrial Iso 1	0.5904	0.0864
Q07954	LRP1 Prolow-density lipoprotein receptor-related protein 1 Iso 2	0.5904	0.4176
P36578	RPL4 60S ribosomal protein L4 Iso 1	0.6048	0.2016
P61803	DAD1 Dolichyl-diphosphooligosaccharide--protein glycosyltransferase subunit DAD1 Iso 1	0.6048	0.504
Q16822	PCK2 Phosphoenolpyruvate carboxykinase [GTP]_ mitochondrial Iso 1	0.6048	0.1872
Q66GS9	CEP135 Centrosomal protein of 135 kDa Iso 1	0.6192	0.144
O00571	DDX3X ATP-dependent RNA helicase DDX3X Iso 2	0.6408	0.1872
P62910	RPL32 60S ribosomal protein L32 Iso 1	0.6336	0.2448
P04181	OAT Ornithine aminotransferase_ mitochondrial Iso 2	0.7128	0.144
O75915	ARL6IP5 PRA1 family protein 3 Iso 1	0.6336	0.3024
Q92499	DDX1 ATP-dependent RNA helicase DDX1 Iso 3	0.6552	0.216
P49748	ACADVL Very long-chain specific acyl-CoA dehydrogenase_ mitochondrial Iso 3	0.6624	0.1152
P61158	ACTR3 Actin-related protein 3 Iso 1	0.648	0.1584
P02751	FN1 Fibronectin Iso 4	0.8352	0.0576
Q9NYL4	FKBP11 Peptidyl-prolyl cis-trans isomerase FKBP11 Iso 2	0.6624	0.0936
P40429	RPL13A 60S ribosomal protein L13a Iso 1	0.6768	0.216
P20908	COL5A1 Collagen alpha-1(V) chain Iso 1	0.6912	0.3024
P35579	MYH9 Myosin-9 Iso 1	0.72	0.036
Q8WUD1	RAB2B Ras-related protein Rab-2B Iso 2	0.7056	0.288
Q9BVK6	TMED9 Transmembrane emp24 domain-containing protein 9 Iso 1	0.72	0.2448
P24844	MYL9 Myosin regulatory light polypeptide 9 Iso 2	0.792	0.1296
O94826	TOMM70 Mitochondrial import receptor subunit TOM70 Iso 1	0.72	0.216
Q14258	TRIM25 E3 ubiquitin/ISG15 ligase TRIM25 Iso 1	0.7488	0.2448
Q96QV6	HIST1H2AA Histone H2A type 1-A Iso 1	0.7776	0.288
P30536	TSPO Translocator protein Iso 1	0.792	0.288
Q8IUE6	HIST2H2AB Histone H2A type 2-B Iso 1	0.8064	0.2736
P16104	H2AFX Histone H2AX Iso 1	0.8064	0.3456
P35580	MYH10 Myosin-10 Iso 2	0.8352	0.072
P46778	RPL21 60S ribosomal protein L21 Iso 1	0.8352	0.2304
P08123	COL1A2 Collagen alpha-2(I) chain Iso 1	0.8496	0.0576
O15260	SURF4 Surfeit locus protein 4 Iso 2	0.864	0.2304
Q8IVL6	P3H3 Prolyl 3-hydroxylase 3 Iso 1	0.8784	0.2016
Q8TED1	GPX8 Probable glutathione peroxidase 8 Iso 1	0.8784	0.4896
P61978	HNRNPK Heterogeneous nuclear ribonucleoprotein K Iso 3	0.9936	0.1152
Q9UQ80	PA2G4 Proliferation-associated protein 2G4 Iso 2	0.972	0.648
Q15366	PCBP2 Poly(rC)-binding protein 2 Iso 6	0.9432	0.5184
P62258	YWHAE 14-3-3 protein epsilon Iso 1	0.9432	0.2016
Q9Y3U8	RPL36 60S ribosomal protein L36 Iso 1	0.9504	0.1728
P42677	RPS27 40S ribosomal protein S27 Iso 1	0.9648	0.4896
P01563	IFNA2 Interferon alpha-2 Iso 1	0.9792	0.1872
P62263	RPS14 40S ribosomal protein S14 Iso 1	0.9792	0.4464
P09486	SPARC SPARC Iso 1	0.9936	0.1728
P32322	PYCR1 Pyrroline-5-carboxylate reductase 1_ mitochondrial Iso 3	1.0224	0.0864
Q96AB3	ISOC2 Isochorismatase domain-containing protein 2 Iso 1	1.1088	0.5544
Q330K2	NDUFAF6 NADH dehydrogenase (ubiquinone) complex I_ assembly factor 6 Iso 1	1.1304	0.3312
Q14699	RFTN1 Raftlin Iso 1	1.1376	0.2592
P21291	CSRP1 Cysteine and glycine-rich protein 1 Iso 1	1.1376	0.144
P02452	COL1A1 Collagen alpha-1(I) chain Iso 1	1.1376	0.0576
P61254	RPL26 60S ribosomal protein L26 Iso 1	1.152	0.1296
O75844	ZMPSTE24 CAAX prenyl protease 1 homolog Iso 1	1.152	0.3024
Q13084	MRPL28 39S ribosomal protein L28_ mitochondrial Iso 1	1.1664	0.3888
Q6NVV1	RPL13AP3 Putative 60S ribosomal protein L13a protein RPL13AP3 Iso 1	1.1952	0.5184
P08754	GNAI3 Guanine nucleotide-binding protein G(k) subunit alpha Iso 1	1.2096	0.4896
O75964	ATP5L ATP synthase subunit g_ mitochondrial Iso 1	1.224	0.216
P21980	TGM2 Protein-glutamine gamma-glutamyltransferase 2 Iso 1	1.3536	0.2016
Q86XL3	ANKLE2 Ankyrin repeat and LEM domain-containing protein 2 Iso 1	1.3824	0.9792
P02545	LMNA Prelamin-A/C Iso 6	1.5408	0.1224
Q9UNL2	SSR3 Translocon-associated protein subunit gamma Iso 1	1.4112	0.1296
Q9Y4F1	FARP1 FERM_ RhoGEF and pleckstrin domain-containing protein 1 Iso 2	1.4328	0.9432
P24821	TNC Tenascin Iso 6	1.4544	0.2088
Q5SW79	CEP170 Centrosomal protein of 170 kDa Iso 3	1.4688	0.2016
P0C0S8	HIST1H2AG;HIST1H2AI;HIST1H2AK;HIST1H2AL;HIST1H2AM Histone H2A type 1 Iso 1	1.4544	2.8512
P62805	HIST1H4A;HIST1H4B;HIST1H4C;HIST1H4D;HIST1H4E;HIST1H4F;HIST1H4H;HIST1H4I;HIST1H4J;HIST1H4K;HIST1H4L;HIST2H4A;HIST2H4B;HIST4H4 Histone H4 Iso 1	1.4832	0.072
Q68CQ7	GLT8D1 Glycosyltransferase 8 domain-containing protein 1 Iso 1	1.512	0.5472
P60709	ACTB Actin_ cytoplasmic 1 Iso 1	1.5696	0.0432
Q9NZQ8	TRPM5 Transient receptor potential cation channel subfamily M member 5 Iso 1	1.6992	0.3024
Q96QR8	PURB Transcriptional activator protein Pur-beta Iso 1	1.6848	1.656
Q13242	SRSF9 Serine/arginine-rich splicing factor 9 Iso 1	1.6992	0.3744
Q12907	LMAN2 Vesicular integral-membrane protein VIP36 Iso 1	1.7712	0.2016
Q86YR5	GPSM1 G-protein-signaling modulator 1 Iso 4	1.8864	0.36
O14513	NCKAP5 Nck-associated protein 5 Iso 1	1.9584	0.576
Q9NSC5	HOMER3 Homer protein homolog 3 Iso 4	2.0016	0.8784
P23528	CFL1 Cofilin-1 Iso 1	2.3184	0.4896
Q99715	COL12A1 Collagen alpha-1(XII) chain Iso 2	2.3472	0.0576
Q93077	HIST1H2AC Histone H2A type 1-C Iso 1	2.52	0.576
Q76L83	ASXL2 Putative Polycomb group protein ASXL2 Iso 1	2.6496	0.4752
Q8WYA0	IFT81 Intraflagellar transport protein 81 homolog CDV-1R	3.0816	4.8384
Q9UBV2	SEL1L Protein sel-1 homolog 1 Iso 1	3.096	0.72
O43707	ACTN4 Alpha-actinin-4 Iso 1	3.7152	0.4608
P99999	CYCS Cytochrome c Iso 1	3.7296	1.7568
A6QL64	ANKRD36 Ankyrin repeat domain-containing protein 36A Iso 1	4.7664	1.368
P = Park2-mutated patients
C = Control subjects
